# Supplementary material for: A three-term recurrence relation for accurate evaluation of transition probabilities of the simple birth-and-death process
Source: Springer Nature journal article supplement (doi:10.1007/s10543-020-00836-x), 2021-02-07
Supplement: MOESM1 [file 18839992]

# Supplementary material to “A three-term recurrence relation for accurate evaluation of transition probabilities of the simple birth-and-death process”

Alberto Pessia<sup>1,\*</sup> and Jing Tang<sup>1</sup>

<sup>1</sup>Research Program in Systems Oncology (ONCOSYS), Faculty of Medicine, University of Helsinki, Helsinki, Finland

## S1 Algorithm for evaluating ${}_2F_1(-a, -b; -(a + b - k); -z)$

---

**Algorithm 1** Hypergeometric evaluation

---

**Input:** Integers  $a \geq 0$ ,  $b \geq 0$ ,  $k \leq 1$ . Real  $z > -1$ .

**Output:**  ${}_2F_1(-a, -b; -(a + b - k); -z)$

**Initialization:**

```
     $m \leftarrow \min(a, b)$ 
     $M \leftarrow \max(a, b)$ 
1: if  $z = 0$  or  $m = 0$  then
2:   return 1
3: end if
4:  $y \leftarrow 1 + \frac{Mz}{M + 1 - k}$ 
5: if  $m = 1$  then
6:   return  $y$ 
7: end if
    // To avoid overflow define  $R_b = y_b/y_{b-1}$ , that is  $y_b = R_b y_{b-1}$ . Note that  $R_1 = y_1/y_0 = y_1$ .
8:  $R \leftarrow y$ 
9: for  $n = 2, \dots, m$  do
10:    $R \leftarrow 1 + \frac{z}{M + n - k} \left( M - n + 1 + \frac{(n - 1)(n - 1 - k)}{(M + n - k - 1)R} \right)$ 
11:    $y \leftarrow Ry$ 
12: end for
13: return  $y$ 
```

---

## S2 Gradient and Hessian of the log-transition probability

Partial derivatives of the log-transition probability are simple but cumbersome. To simplify notation we will drop function arguments (unless required for clarity) and denote the first and second order partial derivatives of a function  $f(x, y)$  with  $f_x$ ,  $f_y$ ,  $f_{xx}$ ,  $f_{xy}$ ,  $f_{yx}$ , and  $f_{yy}$ . We will also use the

---

\*To whom correspondence should be addressed. Email: academic@albertopessia.com

substitutions

$$x = e^{(\lambda-\mu)t}, \quad c^{(h)} = \binom{i}{h} \binom{i+j-h-1}{i-1}, \quad \theta^{(h)} = \mu^{i-h} \lambda^{j-h} \phi(t, \lambda, \mu)^{i+j-2h} \gamma(t, \lambda, \mu)^h,$$

$$u = \frac{{}_2F_1\left[\begin{matrix} -(i-1), -(j-1) \\ -(i+j) \end{matrix}; -z(t, \lambda, \mu)\right]}{{}_2F_1\left[\begin{matrix} -i, -j \\ -(i+j-1) \end{matrix}; -z(t, \lambda, \mu)\right]}, \quad v = \frac{{}_2F_1\left[\begin{matrix} -(i-2), -(j-2) \\ -(i+j+1) \end{matrix}; -z(t, \lambda, \mu)\right]}{{}_2F_1\left[\begin{matrix} -i, -j \\ -(i+j-1) \end{matrix}; -z(t, \lambda, \mu)\right]}$$

Partial derivatives of the log-transition probability, in their most general form, are simply

$$\begin{aligned} (\log p)_\lambda &= \frac{\sum_h c^{(h)} \theta_\lambda^{(h)}}{\sum_k c^{(k)} \theta^{(k)}} & (\log p)_\mu &= \frac{\sum_h c^{(h)} \theta_\mu^{(h)}}{\sum_k c^{(k)} \theta^{(k)}} \\ (\log p)_{\lambda\lambda} &= \frac{\sum_h c^{(h)} \theta_{\lambda\lambda}^{(h)}}{\sum_k c^{(k)} \theta^{(k)}} - (\log p)_\lambda^2 & (\log p)_{\lambda\mu} &= \frac{\sum_h c^{(h)} \theta_{\lambda\mu}^{(h)}}{\sum_k c^{(k)} \theta^{(k)}} - (\log p)_\lambda (\log p)_\mu \\ (\log p)_{\mu\lambda} &= \frac{\sum_h c^{(h)} \theta_{\mu\lambda}^{(h)}}{\sum_k c^{(k)} \theta^{(k)}} - (\log p)_\mu (\log p)_\lambda & (\log p)_{\mu\mu} &= \frac{\sum_h c^{(h)} \theta_{\mu\mu}^{(h)}}{\sum_k c^{(k)} \theta^{(k)}} - (\log p)_\mu^2 \end{aligned}$$

We will now list all partial derivatives of basic functions to be used later in the Section. Partial derivatives of function  $\log \phi(t, \lambda, \mu)$  are

$$\begin{aligned} (\log \phi)_\lambda &= -\frac{x}{\lambda x - \mu} \left(1 - \frac{(\lambda - \mu)t}{x - 1}\right), & (\log \phi)_\mu &= \frac{1}{\lambda x - \mu} \left(1 - \frac{(\lambda - \mu)tx}{x - 1}\right) \\ (\log \phi)_{\lambda\lambda} &= \frac{(x + \mu)t x}{(\lambda x - \mu)^2} \left(1 - \frac{(\lambda - \mu)t}{x - 1}\right) + \frac{tx}{(\lambda x - \mu)(x - 1)} \left(1 - \frac{(\lambda - \mu)tx}{x - 1}\right) \\ (\log \phi)_{\mu\mu} &= \frac{1 + \lambda tx}{(\lambda x - \mu)^2} \left(1 - \frac{(\lambda - \mu)tx}{x - 1}\right) + \frac{tx}{(\lambda x - \mu)(x - 1)} \left(1 - \frac{(\lambda - \mu)t}{x - 1}\right) \\ (\log \phi)_{\lambda\mu} &= -\frac{(1 + \mu)t x}{(\lambda x - \mu)^2} \left(1 - \frac{(\lambda - \mu)t}{x - 1}\right) - \frac{tx}{(\lambda x - \mu)(x - 1)} \left(1 - \frac{(\lambda - \mu)tx}{x - 1}\right) \\ (\log \phi)_{\mu\lambda} &= (\log \phi)_{\lambda\mu} \end{aligned}$$

Partial derivatives of function  $z(t, \lambda, \mu)$  are

$$\begin{aligned} z_\lambda &= \frac{(\lambda - \mu)x}{\lambda\mu(x - 1)^2} \left(\frac{\lambda + \mu}{\lambda} - \frac{(\lambda - \mu)t(x + 1)}{x - 1}\right) \\ z_\mu &= -\frac{(\lambda - \mu)x}{\lambda\mu(x - 1)^2} \left(\frac{\lambda + \mu}{\mu} - \frac{(\lambda - \mu)t(x + 1)}{x - 1}\right) \\ z_{\lambda\lambda} &= \frac{x}{\lambda\mu(x - 1)^2} \left(2 \left(\frac{\mu}{\lambda}\right)^2 - \frac{(\lambda - \mu)t}{x - 1} \left(2 \left(\frac{\lambda + \mu}{\lambda}\right) (x + 1) - \frac{(\lambda - \mu)t}{x - 1} (x^2 + 4x + 1)\right)\right) \\ z_{\mu\mu} &= \frac{x}{\lambda\mu(x - 1)^2} \left(2 \left(\frac{\lambda}{\mu}\right)^2 - \frac{(\lambda - \mu)t}{x - 1} \left(2 \left(\frac{\lambda + \mu}{\mu}\right) (x + 1) - \frac{(\lambda - \mu)t}{x - 1} (x^2 + 4x + 1)\right)\right) \\ z_{\lambda\mu} &= -\frac{x}{\lambda\mu(x - 1)^2} \left(\frac{\lambda^2 + \mu^2}{\lambda\mu} - \frac{(\lambda - \mu)t}{x - 1} \left(\frac{(\lambda + \mu)^2}{\lambda\mu} (x + 1) - \frac{(\lambda - \mu)t}{x - 1} (x^2 + 4x + 1)\right)\right) \\ z_{\mu\lambda} &= z_{\lambda\mu} \end{aligned}$$

Partial derivatives of function  $\log({}_2F_1(-i, -j; -(i+j-1); -z(t, \lambda, \mu)))$  are

$$\begin{aligned}(\log {}_2F_1)_\lambda &= \frac{iju}{i+j-1} z_\lambda, & (\log {}_2F_1)_\mu &= \frac{iju}{i+j-1} z_\mu \\(\log {}_2F_1)_{\lambda\lambda} &= \frac{iju}{i+j-1} \left( z_{\lambda\lambda} + z_\lambda^2 \left( \frac{(i-1)(j-1)v}{i+j-2} \frac{1}{u} - \frac{iju}{i+j-1} \right) \right) \\(\log {}_2F_1)_{\mu\mu} &= \frac{iju}{i+j-1} \left( z_{\mu\mu} + z_\mu^2 \left( \frac{(i-1)(j-1)v}{i+j-2} \frac{1}{u} - \frac{iju}{i+j-1} \right) \right) \\(\log {}_2F_1)_{\lambda\mu} &= \frac{iju}{i+j-1} \left( z_{\lambda\mu} + z_\lambda z_\mu \left( \frac{(i-1)(j-1)v}{i+j-2} \frac{1}{u} - \frac{iju}{i+j-1} \right) \right) \\(\log {}_2F_1)_{\mu\lambda} &= (\log {}_2F_1)_{\lambda\mu}\end{aligned}$$

We can now study the shape of the partial derivatives of the log-transition probability in the various sub-domains. Considering that the binomial coefficient  $\binom{a}{b}$  is equal to zero for all  $b > a$ , we will use the convention that  $\binom{a}{b} / \binom{a}{b}$  is always equal to 1 for all  $a$  and  $b$ .

### Parameters greater than zero

When  $t$ ,  $\lambda$ , and  $\mu$  are all greater than zero we can safely use representation (3.1). We need to distinguish the case  $\mu \neq \lambda$  from the case  $\mu = \lambda$ .

#### Unequal rates

If  $\mu \neq \lambda$  the partial derivatives are simply

$$(\log p)_\lambda = \frac{j}{\lambda} + (i+j)(\log \phi)_\lambda + (\log {}_2F_1)_\lambda \tag{1}$$

$$(\log p)_\mu = \frac{i}{\mu} + (i+j)(\log \phi)_\mu + (\log {}_2F_1)_\mu \tag{2}$$

$$(\log p)_{\lambda\lambda} = -\frac{j}{\lambda^2} + (i+j)(\log \phi)_{\lambda\lambda} + (\log {}_2F_1)_{\lambda\lambda} \tag{3}$$

$$(\log p)_{\mu\mu} = -\frac{i}{\mu^2} + (i+j)(\log \phi)_{\mu\mu} + (\log {}_2F_1)_{\mu\mu} \tag{4}$$

$$(\log p)_{\lambda\mu} = (i+j)(\log \phi)_{\lambda\mu} + (\log {}_2F_1)_{\lambda\mu} \tag{5}$$

$$(\log p)_{\mu\lambda} = (\log p)_{\lambda\mu} \tag{6}$$

### Equal rates

Apply the limit  $\mu \rightarrow \lambda$  directly to equations (1)-(6) to get

$$(\log p)_\lambda|_{\mu=\lambda} = \frac{j}{\lambda} + (i+j) (\log \phi)_\lambda|_{\mu=\lambda} + (\log {}_2F_1)_\lambda|_{\mu=\lambda} \quad (7)$$

$$(\log p)_\mu|_{\mu=\lambda} = \frac{i}{\lambda} + (i+j) (\log \phi)_\mu|_{\mu=\lambda} + (\log {}_2F_1)_\mu|_{\mu=\lambda} \quad (8)$$

$$(\log p)_{\lambda\lambda}|_{\mu=\lambda} = -\frac{j}{\lambda^2} + (i+j) (\log \phi)_{\lambda\lambda}|_{\mu=\lambda} + (\log {}_2F_1)_{\lambda\lambda}|_{\mu=\lambda} \quad (9)$$

$$(\log p)_{\mu\mu}|_{\mu=\lambda} = -\frac{i}{\lambda^2} + (i+j) (\log \phi)_{\mu\mu}|_{\mu=\lambda} + (\log {}_2F_1)_{\mu\mu}|_{\mu=\lambda} \quad (10)$$

$$(\log p)_{\lambda\mu}|_{\mu=\lambda} = (i+j) (\log \phi)_{\lambda\mu}|_{\mu=\lambda} + (\log {}_2F_1)_{\lambda\mu}|_{\mu=\lambda} \quad (11)$$

$$(\log p)_{\mu\lambda}|_{\mu=\lambda} = (\log p)_{\lambda\mu}|_{\mu=\lambda} \quad (12)$$

where

$$\begin{aligned} (\log \phi)_\lambda|_{\mu=\lambda} &= (\log \phi)_\mu|_{\mu=\lambda} = -\frac{t}{2(1+\lambda t)} \\ (\log \phi)_{\lambda\lambda}|_{\mu=\lambda} &= (\log \phi)_{\mu\mu}|_{\mu=\lambda} = \frac{(1-2\lambda t)t^2}{12(1+\lambda t)^2} \\ (\log \phi)_{\lambda\mu}|_{\mu=\lambda} &= (\log \phi)_{\mu\lambda}|_{\mu=\lambda} = \frac{(5+2\lambda t)t^2}{12(1+\lambda t)^2} \\ (\log {}_2F_1)_\lambda|_{\mu=\lambda} &= (\log {}_2F_1)_\mu|_{\mu=\lambda} = -\frac{iju}{(i+j-1)\lambda^3 t^2} \\ (\log {}_2F_1)_{\lambda\lambda}|_{\mu=\lambda} &= \frac{ij}{(i+j-1)\lambda^4 t^2} \left( \frac{(12-\lambda^2 t^2)u}{6} + \frac{(i-1)(j-1)v}{(i+j-2)\lambda^2 t^2} - \frac{iju^2}{(i+j-1)\lambda^2 t^2} \right) \\ (\log {}_2F_1)_{\mu\mu}|_{\mu=\lambda} &= (\log {}_2F_1)_{\lambda\lambda}|_{\mu=\lambda} \\ (\log {}_2F_1)_{\lambda\mu}|_{\mu=\lambda} &= \frac{ij}{(i+j-1)\lambda^4 t^2} \left( \frac{(6+\lambda^2 t^2)u}{6} + \frac{(i-1)(j-1)v}{(i+j-2)\lambda^2 t^2} - \frac{iju^2}{(i+j-1)\lambda^2 t^2} \right) \\ (\log {}_2F_1)_{\mu\lambda}|_{\mu=\lambda} &= (\log {}_2F_1)_{\lambda\mu}|_{\mu=\lambda} \end{aligned}$$

Note that functions  $u$  and  $v$  must be evaluated at the point  $z(t, \lambda, \lambda) = (\lambda t)^{-2} - 1$ .

### Parameters equal to zero

When any of  $t$ ,  $\lambda$ , or  $\mu$  equal zero it is easier to compute the partial derivatives starting from the standard representation (1.2) instead of (3.1). However, derivatives of  $\theta^{(h)}$  are long and complicated, especially the second-order partial derivatives. Considering that intermediate results are not of interest we won't write them here. Instead, we will only provide the required final solutions.

### Observation time is zero

When  $t = 0$  the partial derivatives are always zero regardless of the values of  $i, j, \lambda$ , or  $\mu$ . This is a consequence of the fact that the transition probability, equations (1.6) and (1.8), does not depend on the process rates.

### Death rate is zero

When  $\mu$  approaches zero also the partial derivatives of  $\theta^{(h)}$ , in general, approach zero. Only exceptions are  $\theta_\lambda^{(i)}$ ,  $\theta_\mu^{(i)}$ ,  $\theta_\mu^{(i-1)}$ ,  $\theta_{\lambda\lambda}^{(i)}$ ,  $\theta_{\mu\mu}^{(i)}$ ,  $\theta_{\mu\mu}^{(i-1)}$ ,  $\theta_{\mu\mu}^{(i-2)}$ ,  $\theta_{\lambda\mu}^{(i)}$ ,  $\theta_{\lambda\mu}^{(i-1)}$ ,  $\theta_{\mu\lambda}^{(i)}$ , and  $\theta_{\mu\lambda}^{(i-1)}$ . Partial derivatives become

$$(\log p)_\lambda|_{\mu=0} = -\left(\frac{ix-j}{x-1}\right)t \quad (13)$$

$$(\log p)_\mu|_{\mu=0} = \left(\frac{ix-j}{x-1}\right)t - \frac{i(i-1)x + j(j+1)x^{-1} - 2ij}{(i-j-1)\lambda} \quad (14)$$

$$(\log p)_{\lambda\lambda}|_{\mu=0} = \frac{(i-j)t^2x}{(x-1)^2} \quad (15)$$

$$\begin{aligned} (\log p)_{\mu\mu}|_{\mu=0} &= \frac{(i-j)t^2x}{(x-1)^2} + \frac{i(i-1)j(j+1)(x-1)^4}{(i-j-1)^2(i-j-2)\lambda^2x^2} + \\ &\quad - \frac{i(i-1)(x-2\lambda t)x + j(j+1)(x^{-1} + 2\lambda t)x^{-1} - 2ij}{(i-j-1)\lambda^2} \end{aligned} \quad (16)$$

$$(\log p)_{\lambda\mu}|_{\mu=0} = -\frac{(i-j)t^2x}{(x-1)^2} + \frac{i(i-1)(1-\lambda t)x + j(j+1)(1+\lambda t)x^{-1} - 2ij}{(i-j-1)^2\lambda^2} \quad (17)$$

$$(\log p)_{\mu\lambda}|_{\mu=0} = (\log p)_{\lambda\mu}|_{\mu=0} \quad (18)$$

where  $x = e^{\lambda t}$ . Note that equation (14) has a discontinuity at the value  $j = i - 1$  where

$$\lim_{j \rightarrow (i-1)^-} (\log p)_\mu|_{\mu=0} = -\infty, \quad \lim_{j \rightarrow (i-1)^+} (\log p)_\mu|_{\mu=0} = \infty$$

Equation (16) has a discontinuity at the value  $j = i - 2$  where

$$\lim_{j \rightarrow (i-2)^-} (\log p)_{\mu\mu}|_{\mu=0} = \infty, \quad \lim_{j \rightarrow (i-2)^+} (\log p)_{\mu\mu}|_{\mu=0} = -\infty$$

Equations (17) and (18) have a discontinuity at the value  $j = i - 1$  where

$$\lim_{j \rightarrow (i-1)^-} (\log p)_{\lambda\mu}|_{\mu=0} = -\infty, \quad \lim_{j \rightarrow (i-1)^+} (\log p)_{\lambda\mu}|_{\mu=0} = \infty$$

### Birth rate is zero

When  $\lambda$  approaches zero also the partial derivatives of  $\theta^{(h)}$ , in general, approach zero. Only exceptions are  $\theta_\lambda^{(j)}$ ,  $\theta_\lambda^{(j-1)}$ ,  $\theta_\mu^{(j)}$ ,  $\theta_{\lambda\lambda}^{(j)}$ ,  $\theta_{\lambda\lambda}^{(j-1)}$ ,  $\theta_{\lambda\lambda}^{(j-2)}$ ,  $\theta_{\mu\mu}^{(j)}$ ,  $\theta_{\lambda\mu}^{(j)}$ ,  $\theta_{\lambda\mu}^{(j-1)}$ ,  $\theta_{\mu\lambda}^{(j)}$ , and  $\theta_{\mu\lambda}^{(j-1)}$ . Partial derivatives become

$$(\log p)_\lambda|_{\lambda=0} = \left(\frac{jx-i}{x-1}\right)t - \frac{j(j-1)x + i(i+1)x^{-1} - 2ij}{(j-i-1)\mu} \quad (19)$$

$$(\log p)_\mu|_{\lambda=0} = -\left(\frac{jx-i}{x-1}\right)t \quad (20)$$

$$\begin{aligned} (\log p)_{\lambda\lambda}|_{\lambda=0} &= \frac{(j-i)t^2x}{(x-1)^2} + \frac{j(j-1)i(i+1)(x-1)^4}{(j-i-1)^2(j-i-2)\mu^2x^2} + \\ &\quad - \frac{j(j-1)(x-2\mu t)x + i(i+1)(x^{-1} + 2\mu t)x^{-1} - 2ij}{(j-i-1)\mu^2} \end{aligned} \quad (21)$$

$$(\log p)_{\mu\mu}|_{\lambda=0} = \frac{(j-i)t^2x}{(x-1)^2} \quad (22)$$

$$(\log p)_{\lambda\mu}|_{\lambda=0} = -\frac{(j-i)t^2x}{(x-1)^2} + \frac{j(j-1)(1-\mu t)x + i(i+1)(1+\mu t)x^{-1} - 2ij}{(j-i-1)^2\mu^2} \quad (23)$$

$$(\log p)_{\mu\lambda}|_{\lambda=0} = (\log p)_{\lambda\mu}|_{\mu=0} \quad (24)$$

where  $x = e^{\mu t}$ . Note that equation (19) has a discontinuity at the value  $j = i + 1$  where

$$\lim_{j \rightarrow (i+1)^-} (\log p)_\lambda|_{\lambda=0} = \infty, \quad \lim_{j \rightarrow (i+1)^+} (\log p)_\lambda|_{\lambda=0} = -\infty$$

Equation (21) has a discontinuity at the value  $j = i + 2$  where

$$\lim_{j \rightarrow (i+2)^-} (\log p)_{\mu\mu}|_{\lambda=0} = -\infty, \quad \lim_{j \rightarrow (i+2)^+} (\log p)_{\mu\mu}|_{\lambda=0} = \infty$$

Equations (23) and (24) have a discontinuity at the value  $j = i + 1$  where

$$\lim_{j \rightarrow (i+1)^-} (\log p)_{\lambda\mu}|_{\lambda=0} = \infty, \quad \lim_{j \rightarrow (i+1)^+} (\log p)_{\lambda\mu}|_{\lambda=0} = -\infty$$

### Both rates are zero

The gradient of the log-transition probability at the origin is only defined when  $j = i$ . To prove it, we will compute the limit  $(\lambda, \mu) \rightarrow (0, 0)$  from different directions and observe whether they all converge to the same value or not. If  $j \neq i$

$$\lim_{\lambda \rightarrow 0} (\log p)_\lambda|_{\mu=0} = \operatorname{sgn}(j-i)\infty, \quad \lim_{\mu \rightarrow 0} (\log p)_\lambda|_{\lambda=0} = -\frac{(i+j)t}{2}, \quad \lim_{\lambda \rightarrow 0} (\log p)_\lambda|_{\mu=\lambda} = 0$$

and

$$\lim_{\lambda \rightarrow 0} (\log p)_\mu|_{\mu=0} = -\frac{(i+j)t}{2}, \quad \lim_{\mu \rightarrow 0} (\log p)_\mu|_{\lambda=0} = \operatorname{sgn}(i-j)\infty, \quad \lim_{\lambda \rightarrow 0} (\log p)_\mu|_{\mu=\lambda} = 0$$

The same phenomenon can be observed with the second-order partial derivatives. When  $j = i$  the first-order partial derivatives converge to  $-it$ . Second-order partial derivatives  $(\log p)_{\lambda\lambda}$  and

$(\log p)_{\mu\mu}$  converge to 0 while  $(\log p)_{\lambda\mu}$  and  $(\log p)_{\mu\lambda}$  converge to  $i^2 t^2$ . If we interpret the transition probability as the likelihood of a single time point observation, these results are intuitive. Indeed, if  $j \neq i$  the rates cannot be both equal to zero. If  $j = i$ , instead, the hypothesis  $\lambda = \mu = 0$  is plausible because it is compatible with the observation.
